# Supplementary material for: Extending the Shelf-Life of Fresh-Cut Green Bean Pods by Ethanol, Ascorbic Acid, and Essential Oils
Source: MDPI journal article supplement (doi:10.3390/foods10051103), 2021-05-17
Supplement: s1 [file s1]

Supplementary table 1: Effect of ethanol, ascorbic acid (AsA), peppermint oil (PMO), and tea tree oil (TTO) on appearance, weight loss, firmness, total chlorophyll, and vitamin C of fresh-cut green bean pods stored at 5°C for 15 d. Different letters indicate significant differences between every storage point ( $p < 0.05$ ) using Tukey test at the same column. Data are means of three replicates.

| Appearance                                  |          |          |         |          |         |
|---------------------------------------------|----------|----------|---------|----------|---------|
|                                             | Ethanol  | AsA      | PMO     | TTO      | Control |
| 3 d                                         | 5.00 a   | 5.00 a   | 5.00 a  | 5.00 a   | 5.00 a  |
| 6 d                                         | 5.00 a   | 5.00 a   | 4.50 ab | 4.16 b   | 4.50 a  |
| 9 d                                         | 5.00 a   | 5.00 a   | 4.00 b  | 4.00 c   | 4.00 b  |
| 12 d                                        | 5.00 a   | 5.00 a   | 4.00 b  | 3.00 d   | 3.00 c  |
| 15 d                                        | 5.00 a   | 4.00 a   | 3.00 c  | 3.00 d   | 2.00 d  |
| Weight loss (%)                             |          |          |         |          |         |
|                                             | Ethanol  | AsA      | PMO     | TTO      | Control |
| 3 d                                         | 0.46 d   | 0.58 a   | 0.60 c  | 0.68 d   | 0.61 e  |
| 6 d                                         | 1.16 c   | 0.81 b   | 0.76 c  | 0.84 c   | 0.71 d  |
| 9 d                                         | 1.25 b   | 0.95 b   | 1.56 b  | 0.90 c   | 1.65 c  |
| 12 d                                        | 1.29 b   | 1.57 c   | 1.58 b  | 1.95 b   | 2.74 b  |
| 15 d                                        | 2.52 a   | 2.88 d   | 2.60 a  | 2.97 a   | 3.53 a  |
| Firmness (N)                                |          |          |         |          |         |
|                                             | Ethanol  | AsA      | PMO     | TTO      | Control |
| 3 d                                         | 2.26 a   | 2.47 a   | 2.53 a  | 2.00 a   | 2.02 a  |
| 6 d                                         | 1.93 b   | 1.85 b   | 1.82 b  | 1.83 ab  | 1.83 b  |
| 9 d                                         | 1.88 b   | 1.91 b   | 1.91 b  | 1.68 ab  | 1.50 b  |
| 12 d                                        | 1.55 c   | 1.80 b   | 1.80 b  | 1.63 bc  | 1.33 b  |
| 15 d                                        | 1.25 d   | 1.41 c   | 1.53 c  | 1.28 c   | 1.25 c  |
| Chlorophyll content (mg.g <sup>-1</sup> FW) |          |          |         |          |         |
|                                             | Ethanol  | AsA      | PMO     | TTO      | Control |
| 3 d                                         | 23.6 a   | 23.60 a  | 23.60 a | 23.60 a  | 23.60 a |
| 6 d                                         | 22.34 a  | 22.17 a  | 23.46 a | 22.85 a  | 22.88 a |
| 9 d                                         | 18.44 b  | 18.416 b | 17.67 b | 17.78 b  | 14.73 b |
| 12 d                                        | 16.58 bc | 16.32 c  | 15.98 c | 15.68 c  | 13.72 b |
| 15 d                                        | 14.10 c  | 12.11 d  | 11.26 d | 12.54 d  | 9.78 c  |
| Vitamin C (mg.100 g <sup>-1</sup> FW)       |          |          |         |          |         |
|                                             | Ethanol  | AsA      | PMO     | TTO      | Control |
| 3 d                                         | 23.23 a  | 23.56 a  | 22.90 a | 22.90 a  | 22.90 a |
| 6 d                                         | 20.10 ab | 20.84 ab | 20.97 a | 20.96 ab | 20.75 a |
| 9 d                                         | 19.33 ab | 18.84 b  | 17.92 b | 17.43 bc | 17.46 b |
| 12 d                                        | 15.93 bc | 15.89 c  | 14.13 c | 15.16 c  | 12.34 c |
| 15 d                                        | 12.75 c  | 15.10 c  | 11.30 d | 11.79 d  | 9.25 d  |

Supplementary table 2: Effect of ethanol, ascorbic acid (AsA), peppermint oil (PMO), and tea tree oil (TTO) on total soluble solids (TSS), and total phenolic compound (TPC), mold and yeast (CFU/g), and total count (CFU/g) of fresh-cut green bean pods storied at 5°C for 15 d. Different letters indicate significant differences between every storage point ( $p < 0.05$ ) using Tukey test at the same column. Data are means of three replicates.

|      | TSS (%)                  |          |          |           |          |
|------|--------------------------|----------|----------|-----------|----------|
|      | Ethanol                  | AsA      | PMO      | TTO       | Control  |
| 3 d  | 5.93 a                   | 5.60 a   | 6.33 a   | 5.26 a    | 5.33 a   |
| 6 d  | 5.96 a                   | 5.60 a   | 5.83 b   | 5.26 a    | 5.09 b   |
| 9 d  | 5.60 b                   | 5.26 b   | 5.36 c   | 5.33 a    | 5.27 a   |
| 12 d | 5.76 bc                  | 5.83 a   | 5.30 c   | 5.40 b    | 5.50 a   |
| 15 d | 5.46 c                   | 5.40 b   | 5.60 b   | 5.43 b    | 5.48 a   |
|      | TPC (mg GAE. 100 g-1 FW) |          |          |           |          |
|      | Ethanol                  | AsA      | PMO      | TTO       | Control  |
| 3 d  | 143.60 d                 | 138.17 d | 146.02 d | 136.40 d  | 156.68 d |
| 6 d  | 151.57 c                 | 142.87 c | 178.78c  | 176.77 c  | 187.27 b |
| 9 d  | 163.04 b                 | 156.49 b | 207.36 a | 227.01 a  | 204.86 a |
| 12 d | 171.43 a                 | 182.51 a | 193.38 b | 218.52 ab | 168.30 c |
| 15 d | 154.62 c                 | 144.00 c | 175.34 c | 208.10 b  | 137.05 e |
|      | Total sugars (%)         |          |          |           |          |
|      | Ethanol                  | AsA      | PMO      | TTO       | Control  |
| 3 d  | 2.53 b                   | 2.33 a   | 2.90 c   | 3.33 c    | 1.46 b   |
| 6 d  | 2.26 b                   | 2.43 a   | 3.00 bc  | 3.40 bc   | 1.50 ab  |
| 9 d  | 2.70 b                   | 2.66 a   | 3.26 bc  | 3.43 bc   | 1.55 ab  |
| 12 d | 3.46 a                   | 2.90 a   | 3.43 ab  | 3.70 ab   | 1.60 ab  |
| 15 d | 3.43 a                   | 3.10 a   | 3.80 a   | 3.83 a    | 1.80 a   |
|      | Mold and yeast (CFU/g)   |          |          |           |          |
|      | Ethanol                  | AsA      | PMO      | TTO       | Control  |
| 3 d  | 0.00 b                   | 0.00 b   | 0.00 b   | 0.00 b    | 0.00 b   |
| 6 d  | 0.00 b                   | 1.28 a   | 0.00 b   | 0.00 b    | 1.54 a   |
| 9 d  | 0.00 b                   | 1.37 a   | 0.00 b   | 0.00 b    | 1.67 a   |
| 12 d | 0.00 b                   | 1.48 a   | 1.44 a   | 1.41 a    | 1.69 a   |
| 15 d | 1.35 a                   | 1.32 a   | 1.49 a   | 1.37 a    | 1.79 a   |
|      | Total count (CFU/g)      |          |          |           |          |
|      | Ethanol                  | AsA      | PMO      | TTO       | Control  |
| 3 d  | 0.00 b                   | 0.00 d   | 0.00 b   | 0.00 b    | 0.00 c   |
| 6 d  | 0.00 b                   | 0.00 d   | 0.00 b   | 0.00 b    | 1.72 b   |
| 9 d  | 0.00 b                   | 0.63 c   | 0.00 b   | 0.00 b    | 1.77 b   |
| 12 d | 0.00 b                   | 0.90 b   | 1.47 a   | 1.55 a    | 1.93 ab  |
| 15 d | 0.53 a                   | 1.30 a   | 1.49 a   | 1.56 a    | 2.05 a   |
